# Supplementary material for: Novel methodology to enrich medium- and short-chain fatty acids in milk fat to improve metabolic health
Source: Royal Society of Chemistry journal article supplement (doi:10.1039/d4fo00267a), 2024-01-01
Supplement: d4fo00267a1.pdf [file d4fo00267a1.pdf]

1 **Table S1** Fatty acid composition expressed as percent by weight of total fatty acids.

|             |                      | Laboratory scale |              |              | Production scale |              |              |
|-------------|----------------------|------------------|--------------|--------------|------------------|--------------|--------------|
|             |                      | Milk fat         | MSFAT        | Retentate    | Milk fat         | MSFAT        | Retentate    |
|             |                      | ----- (%) -----  |              |              | ----- (%) -----  |              |              |
| <b>SCFA</b> | C4                   | 4.37 ± 0.08      | 10.23 ± 0.00 | 3.57 ± 0.00  | 4.30 ± 0.11      | 10.11 ± 0.19 | 3.59 ± 0.11  |
|             | C6                   | 3.04 ± 0.04      | 5.67 ± 0.07  | 2.74 ± 0.02  | 2.83 ± 0.05      | 5.32 ± 0.08  | 2.48 ± 0.07  |
|             | C8                   | 1.68 ± 0.01      | 3.64 ± 0.06  | 1.46 ± 0.02  | 1.53 ± 0.01      | 2.98 ± 0.04  | 1.30 ± 0.03  |
| <b>MCFA</b> | C10                  | 3.73 ± 0.01      | 6.79 ± 0.06  | 3.29 ± 0.03  | 3.19 ± 0.01      | 5.58 ± 0.05  | 2.81 ± 0.03  |
|             | C11                  | 0.09 ± 0.00      | 0.16 ± 0.00  | 0.08 ± 0.00  | 0.06 ± 0.00      | 0.11 ± 0.00  | 0.05 ± 0.00  |
|             | C12                  | 4.25 ± 0.01      | 7.35 ± 0.03  | 3.74 ± 0.03  | 3.60 ± 0.01      | 6.11 ± 0.04  | 3.24 ± 0.04  |
| <b>LCFA</b> | C13                  | 0.13 ± 0.00      | 0.19 ± 0.00  | 0.12 ± 0.00  | 0.11 ± 0.00      | 0.16 ± 0.00  | 0.10 ± 0.00  |
|             | C4                   | 11.22 ± 0.00     | 15.09 ± 0.02 | 10.45 ± 0.05 | 11.07 ± 0.01     | 15.25 ± 0.07 | 10.64 ± 0.11 |
|             | C14:1                | 0.83 ± 0.00      | 0.83 ± 0.00  | 0.85 ± 0.00  | 1.02 ± 0.00      | 0.95 ± 0.01  | 0.97 ± 0.01  |
|             | C15                  | 0.98 ± 0.00      | 1.14 ± 0.00  | 0.94 ± 0.00  | 1.03 ± 0.00      | 1.26 ± 0.01  | 1.02 ± 0.01  |
|             | C16                  | 30.18 ± 0.11     | 27.83 ± 0.06 | 30.01 ± 0.03 | 29.78 ± 0.06     | 30.14 ± 0.21 | 30.72 ± 0.39 |
|             | C16:1                | 1.22 ± 0.00      | 0.98 ± 0.00  | 1.29 ± 0.00  | 1.59 ± 0.00      | 1.28 ± 0.01  | 1.52 ± 0.02  |
|             | C17                  | 0.42 ± 0.00      | 0.30 ± 0.00  | 0.43 ± 0.01  | 0.49 ± 0.00      | 0.38 ± 0.00  | 0.52 ± 0.01  |
|             | C18                  | 12.13 ± 0.07     | 6.85 ± 0.06  | 12.76 ± 0.01 | 10.2 ± 0.06      | 5.69 ± 0.06  | 11.28 ± 0.17 |
|             | C18:1 trans          | 0.05 ± 0.00      | 0.02 ± 0.00  | 0.05 ± 0.00  | 0.03 ± 0.00      | 0.01 ± 0.01  | 0.03 ± 0.00  |
|             | C18:1 n9 trans       | 0.72 ± 0.01      | 0.35 ± 0.07  | 0.78 ± 0.00  | 0.36 ± 0.01      | 0.24 ± 0.04  | 0.38 ± 0.01  |
|             | C18:1 n11 trans      | 2.46 ± 0.00      | 1.20 ± 0.06  | 2.66 ± 0.00  | 1.88 ± 0.02      | 0.86 ± 0.04  | 1.96 ± 0.02  |
|             | C18:1 n9 cis         | 18.75 ± 0.10     | 9.38 ± 0.05  | 20.64 ± 0.00 | 22.30 ± 0.11     | 11.06 ± 0.11 | 22.18 ± 0.29 |
|             | C18:2 n6 trans       | 0.00 ± 0.01      | 0.00 ± 0.00  | 0.00 ± 0.02  | 0.01 ± 0.01      | 0.00 ± 0.00  | 0.02 ± 0.01  |
|             | C18:2 n6 cis         | 1.66 ± 0.02      | 0.82 ± 0.01  | 1.84 ± 0.01  | 1.92 ± 0.00      | 0.95 ± 0.02  | 1.90 ± 0.03  |
|             | C20                  | 0.18 ± 0.01      | 0.06 ± 0.00  | 0.20 ± 0.00  | 0.15 ± 0.01      | 0.03 ± 0.00  | 0.18 ± 0.00  |
|             | C18:3 n6             | 0.02 ± 0.04      | 0.02 ± 0.00  | 0.02 ± 0.02  | 0.05 ± 0.01      | 0.07 ± 0.03  | 0.06 ± 0.01  |
|             | C20:1                | 0.10 ± 0.01      | 0.03 ± 0.00  | 0.11 ± 0.10  | 0.21 ± 0.03      | 0.06 ± 0.02  | 0.24 ± 0.06  |
|             | C18:3 n3             | 0.53 ± 0.01      | 0.28 ± 0.00  | 0.58 ± 0.04  | 0.68 ± 0.01      | 0.39 ± 0.03  | 0.67 ± 0.03  |
|             | CLA 9.11             | 0.62 ± 0.01      | 0.22 ± 0.00  | 0.70 ± 0.01  | 0.63 ± 0.00      | 0.22 ± 0.01  | 0.64 ± 0.02  |
|             | C21                  | 0.02 ± 0.01      | 0.00 ± 0.00  | 0.05 ± 0.01  | 0.05 ± 0.00      | 0.00 ± 0.00  | 0.06 ± 0.01  |
| C20:2       | 0.01 ± 0.00          | 0.00 ± 0.01      | 0.00 ± 0.00  | 0.03 ± 0.00  | 0.00 ± 0.00      | 0.03 ± 0.00  |              |
| C22         | 0.05 ± 0.00          | 0.00 ± 0.00      | 0.05 ± 0.00  | 0.10 ± 0.01  | 0.02 ± 0.00      | 0.10 ± 0.00  |              |
| C20:3 n6    | 0.07 ± 0.00          | 0.02 ± 0.00      | 0.08 ± 0.00  | 0.08 ± 0.00  | 0.02 ± 0.00      | 0.08 ± 0.00  |              |
| C22:1 n9    | 0.00 ± 0.00          | 0.00 ± 0.00      | 0.00 ± 0.01  | 0.00 ± 0.00  | 0.00 ± 0.00      | 0.00 ± 0.00  |              |
| C20:3 n3    | 0.00 ± 0.00          | 0.00 ± 0.01      | 0.00 ± 0.00  | 0.01 ± 0.01  | 0.10 ± 0.01      | 0.00 ± 0.00  |              |
| C20:4 n6    | 0.11 ± 0.00          | 0.03 ± 0.00      | 0.13 ± 0.00  | 0.12 ± 0.00  | 0.01 ± 0.01      | 0.09 ± 0.06  |              |
| C23:0       | 0.01 ± 0.00          | 0.00 ± 0.00      | 0.00 ± 0.00  | 0.00 ± 0.00  | 0.02 ± 0.01      | 0.03 ± 0.06  |              |
| C22:2       | 0.03 ± 0.01          | 0.01 ± 0.01      | 0.04 ± 0.00  | 0.06 ± 0.01  | 0.05 ± 0.02      | 0.06 ± 0.01  |              |
| C24:0       | 0.08 ± 0.05          | 0.18 ± 0.00      | 0.08 ± 0.00  | 0.09 ± 0.02  | 0.00 ± 0.00      | 0.11 ± 0.05  |              |
| C20:5 n3    | 0.08 ± 0.02          | 0.21 ± 0.02      | 0.09 ± 0.01  | 0.07 ± 0.05  | 0.08 ± 0.11      | 0.11 ± 0.03  |              |
| C24:1       | 0.00 ± 0.00          | 0.00 ± 0.00      | 0.00 ± 0.02  | 0.02 ± 0.04  | 0.00 ± 0.00      | 0.01 ± 0.01  |              |
| C22:6 n3    | 0.00 ± 0.13          | 0.00 ± 0.00      | 0.00 ± 0.00  | 0.06 ± 0.07  | 0.30 ± 0.48      | 0.55 ± 0.85  |              |
| <hr/>       |                      |                  |              |              |                  |              |              |
|             | SFCA                 | 6.90 ± 0.12      | 6.1 ± 0.11   | 15.0 ± 0.38  | 7.13 ± 0.16      | 15.43 ± 0.27 | 6.07 ± 0.19  |
|             | MCFA                 | 10.1 ± 0.22      | 9.2 ± 0.13   | 20.2 ± 0.81  | 8.37 ± 0.03      | 14.78 ± 0.13 | 7.40 ± 0.10  |
|             | LCFA Saturated       | 57.3 ± 1.17      | 58.5 ± 1.14  | 51.1 ± 1.35  | 53.07 ± 0.18     | 52.96 ± 0.37 | 54.76 ± 0.81 |
|             | LCFA Monounsaturated | 22.8 ± 1.46      | 23.1 ± 0.95  | 12.3 ± 1.25  | 27.4 ± 0.21      | 14.46 ± 0.23 | 27.27 ± 0.44 |
|             | LCFA Polyunsaturated | 3.0 ± 0.55       | 3.0 ± 0.45   | 1.4 ± 0.36   | 3.72 ± 0.18      | 2.19 ± 0.72  | 4.22 ± 1.05  |
